# Supplementary material for: Meta-analysis of the interaction between serotonin transporter promoter variant, stress, and posttraumatic stress disorder
Source: PubMed Central journal article supplement (PMC5705670; doi:10.1038/s41598-017-15168-0), 2017-11-28
Supplement: 41598_2017_15168_MOESM1_ESM.pdf [file 41598_2017_15168_MOESM1_ESM.pdf]

## Title page

Meta-analysis of the interaction between serotonin transporter promoter variant, stress, and posttraumatic stress disorder

Mingzhe Zhao<sup>1,2</sup>, Jiarun Yang<sup>1,2</sup>, Wenbo Wang<sup>1</sup>, Jingsong Ma<sup>1</sup>, Jian Zhang<sup>1</sup>, Xueyan Zhao<sup>1</sup>, Xiaohui Qiu<sup>1</sup>, Xiuxian Yang<sup>1</sup>, Zhengxue Qiao<sup>1</sup>, Xuejia Song<sup>1</sup>, Lin Wang<sup>1</sup>, Shixiang Jiang<sup>1</sup>, Erying Zhao<sup>1</sup>, Yanjie Yang<sup>1,\*</sup>

<sup>1</sup> No. 157, Baojian Road, Nangang District, Harbin 150081, China.

Tel: +86 451 87502859;

<sup>2</sup> These authors contributed equally to this work.

\*Correspondence: Professor Yanjie Yang, Psychology Department of the Public Health Institute of Harbin Medical University, Heilongjiang Province, China.

Address: No. 157, Baojian Road, Nangang District, Harbin 150081, China. Tel: +86 451 87502859; Fax: +86 451 87502885

E-mail: [yanjie1965@163.com](mailto:yanjie1965@163.com)

|              |                                |                |                          |
|--------------|--------------------------------|----------------|--------------------------|
| Mingzhe Zhao | E-mail: 1018625419@qq.com      | Xiuxian Yang   | E-mail: 125020874@qq.com |
| Jiarun Yang  | E-mail: 1287991708@qq.com      | Zhengxue Qiao  | E-mail: 83571560@qq.com  |
| Wenbo Wang   | E-mail: 1356517578@qq.com      | Xuejia Song    | E-mail: 4874452@qq.com   |
| Jingsong Ma  | E-mail: 13945105753@126.com    | Lin Wang       | E-mail: 466373279@qq.com |
| Jian Zhang   | E-mail: tengteng198312@126.com | Shixiang Jiang | E-mail: 32871873@qq.com  |
| Xueyan Zhao  | E-mail: 1375970357@qq.com      | Shixiang Jiang | E-mail: 32871873@qq.com  |
| Xiaohui Qiu  | E-mail: qiuxiaohui@foxmail.com |                |                          |

**Supplementary Table S1.** Studies included in the meta-analysis of the interaction between 5-HTTLPR polymorphism, life stress, and PTSD

| Study                   | Items (+/-) | Objectives and hypothesis clearly stated | Clear eligibility criteria for study participants | Clear definition of all variables | Statistical methods replicable | Assessment of HWE | Assessment of ethnicity | Mixed ethnicities addressed statistically | Sufficient descriptive data (e.g., age, sex, etc.) | Genotype frequencies stated | Sample in HWE | Population stratification |
|-------------------------|-------------|------------------------------------------|---------------------------------------------------|-----------------------------------|--------------------------------|-------------------|-------------------------|-------------------------------------------|----------------------------------------------------|-----------------------------|---------------|---------------------------|
| Kilpatrick et al., 2007 |             | +                                        | -                                                 | +                                 | +                              | -                 | +                       | +                                         | +                                                  | +                           | -             | +                         |
| Grabe et al., 2009      |             | +                                        | -                                                 | +                                 | +                              | +                 | +                       | Unnecessary                               | +                                                  | +                           | +             | -                         |
| Xie et al., 2009        |             | +                                        | +                                                 | +                                 | +                              | -                 | +                       | Unnecessary                               | +                                                  | +                           | -             | Unnecessary               |
| Kolassa et al., 2009    |             | -                                        | -                                                 | +                                 | +                              | +                 | +                       | Unnecessary                               | +                                                  | +                           | +             | Unnecessary               |
| Holman et al., 2011     |             | +                                        | +                                                 | +                                 | +                              | +                 | +                       | Unnecessary                               | +                                                  | +                           | +             | Unnecessary               |
| Mercer et al., 2012     |             | +                                        | -                                                 | +                                 | +                              | +                 | +                       | +                                         | +                                                  | +                           | +             | +                         |
| Xie et al., 2012        |             | +                                        | +                                                 | +                                 | +                              | -                 | +                       | Unnecessary                               | +                                                  | +                           | -             | Unnecessary               |
| Wald et al., 2013       |             | +                                        | -                                                 | +                                 | +                              | -                 | +                       | +                                         | +                                                  | +                           | -             | +                         |
| Pietrzak et al., 2013   |             | +                                        | +                                                 | +                                 | +                              | +                 | +                       | -                                         | +                                                  | +                           | +             | +                         |
| La Greca et al., 2013   |             | +                                        | -                                                 | +                                 | +                              | -                 | +                       | -                                         | +                                                  | +                           | +             | -                         |
| Walsh et al., 2014      |             | +                                        | -                                                 | +                                 | +                              | +                 | -                       | -                                         | +                                                  | +                           | +             | -                         |
| Telch et al., 2015      |             | +                                        | +                                                 | +                                 | +                              | -                 | +                       | +                                         | +                                                  | +                           | -             | +                         |
| Tian et al., 2015       |             | +                                        | -                                                 | +                                 | +                              | -                 | -                       | Unnecessary                               | +                                                  | +                           | -             | Unnecessary               |
| Drevo et al., 2016      |             | +                                        | +                                                 | +                                 | +                              | -                 | -                       | -                                         | +                                                  | +                           | -             | -                         |

Abbreviations: HWE, Hardy–Weinberg equilibrium; 5-HTTLPR, serotonin transporter promoter variant.

**Supplementary Table S2.** The demographic information for Case group and Control group of studies on the interaction between 5-HTTLPR, life stress, and PTSD included in the meta-analysis.

| study                   | Case group          |              |                  | Control group       |              |                  |
|-------------------------|---------------------|--------------|------------------|---------------------|--------------|------------------|
|                         | No. of participants | Female, N(%) | Age, mean(years) | No. of participants | Female, N(%) | Age, mean(years) |
| Kilpatrick et al., 2007 | 19                  | -            | -                | 537                 | -            | -                |
| Grabe et al., 2009      | 67                  | 64.2         | 57.9             | 1596                | 49.3         | 57.6             |
| Xie et al., 2009        | 229                 | 41.9         | 39.3             | 1023                | 54.7         | 38.9             |
| Kolassa et al., 2009    | 331                 | -            | -                | 77                  | -            | -                |
| Holman et al., 2011     | 303                 | 52.4         | 51.77            | 468                 | -            | -                |
| Mercer et al., 2012     | 66                  | 100          | 20.3             | 138                 | 100          | 20               |
| Xie et al., 2012        | 719                 | -            | -                | 5711                | -            | -                |
| Wald et al., 2013       | -                   | -            | -                | -                   | -            | -                |
| Pietrzak et al., 2013   | 13                  | -            | -                | 136                 | -            | -                |
| La Greca et al., 2013   | -                   | -            | -                | -                   | -            | -                |
| Walsh et al., 2014      | 205                 | -            | -                | 477                 | -            | -                |
| Telch et al., 2015      | -                   | -            | -                | -                   | -            | -                |
| Tian et al., 2015       | 64                  | -            | -                | 119                 | -            | -                |
| Drevo et al., 2016      | -                   | -            | -                | -                   | -            | -                |

-, no report in the study.
